# Supplementary material for: The fate of the duplicated androgen receptor in fishes: a late neofunctionalization event?
Source: PubMed Central journal article supplement (PMC2637867; doi:10.1186/1471-2148-8-336), 2008-12-18
Supplement: 1471-2148-8-336-S3.pdf [file 1471-2148-8-336-S3.pdf]

**A**Tetraodon  
vs.  
Medaka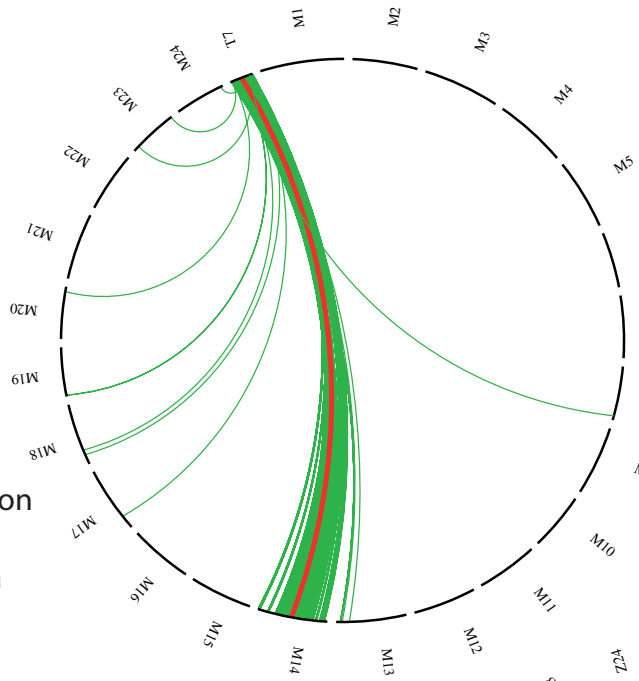**B**Tetraodon  
vs.  
Medaka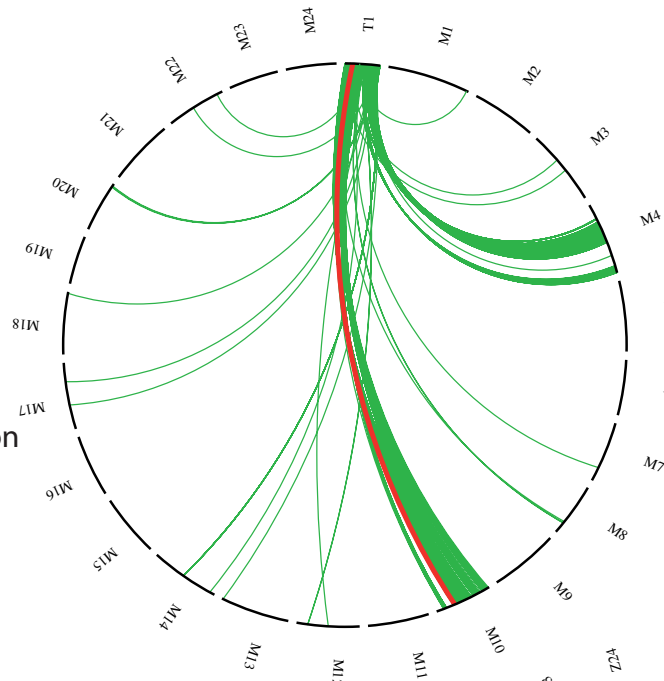**C**Medaka  
vs.  
Zebrafish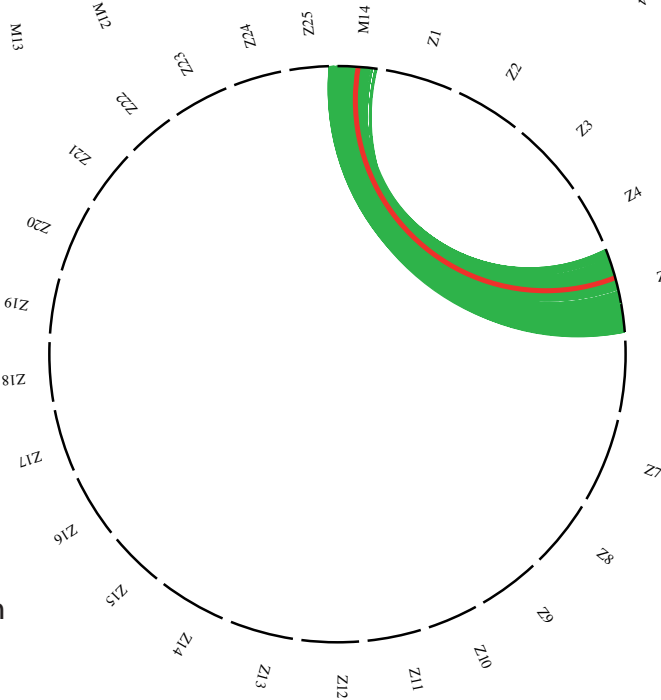**D**Medaka  
vs.  
Zebrafish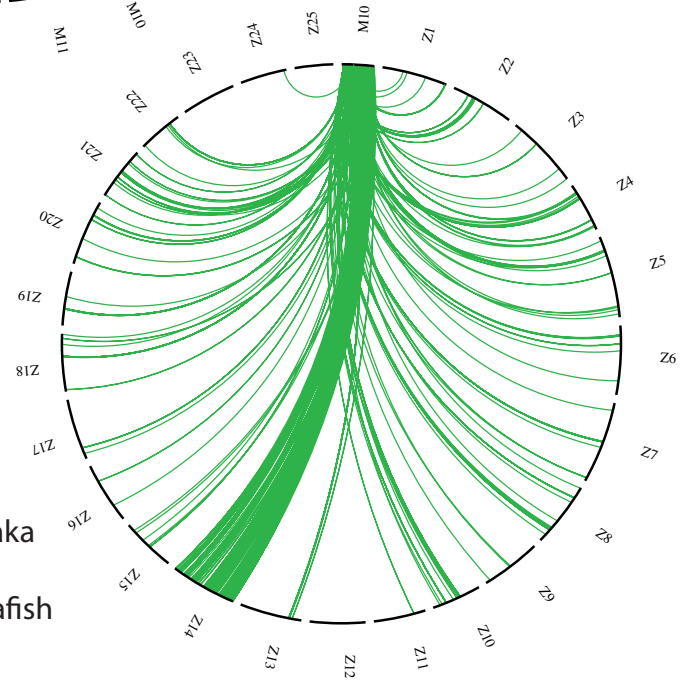**E**

| gene | ensembl access number | chr | begins   | ensembl access number | chr                | begins |          |
|------|-----------------------|-----|----------|-----------------------|--------------------|--------|----------|
| AR-A | GSTENP00022234001     | T7  | 5709839  | AR-B                  | GSTENP00029350001  | T1     | 3750253  |
| AR-A | ENSORLP00000011941    | M14 | 17226291 | AR-B                  | ENSORLP00000010323 | M10    | 18354970 |
| AR-A | ENSDARP00000016299    | Z5  | 29754568 |                       |                    |        |          |
