# Supplementary material for: The fate of the duplicated androgen receptor in fishes: a late neofunctionalization event?
Source: PubMed Central journal article supplement (PMC2637867; doi:10.1186/1471-2148-8-336), 2008-12-18

# Distribution of Inertia Percentage Between Classes and Observed Value

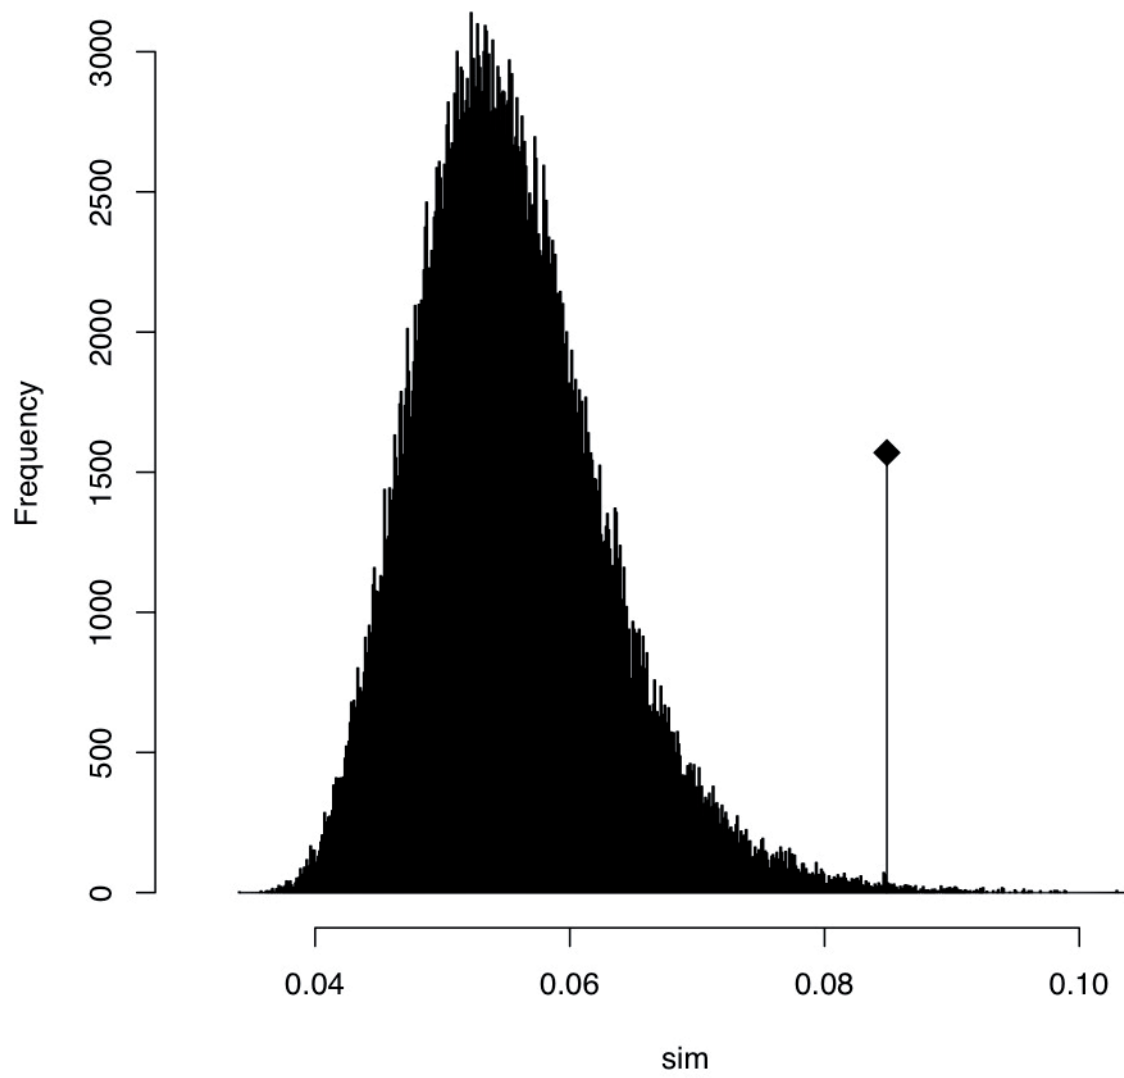

Supplement: 1471-2148-8-336-S4.pdf [file 1471-2148-8-336-S4.pdf]
